# Supplementary material
Source: PubMed Central journal article supplement (PMC2277483)
Supplement: NIHMS42003-supplement-01.pdf [file NIHMS42003-supplement-01.pdf]

**Regioselectivity of Human UDP-Glucuronyltransferase 1A1  
in the Synthesis of Flavonoid Glucuronides Determined by Metal Complexation  
and Tandem Mass Spectrometry**

**Barry D Davis and Jennifer S Brodbelt\***

Department of Chemistry and Biochemistry,  
University of Texas at Austin, Austin, TX 78712, USA

Supplemental Material

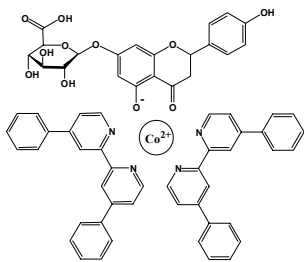

m/z 1170  
precursor ion

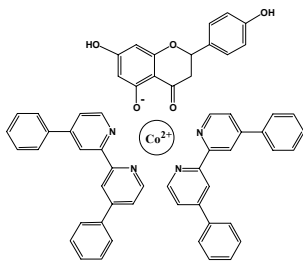

m/z 994  
-GlcA

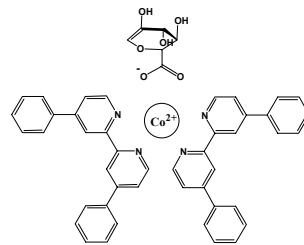

m/z 898  
-Agl

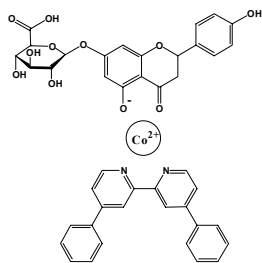

m/z 838  
-Aux

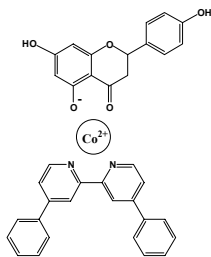

m/z 662  
-(Aux + GlcA)

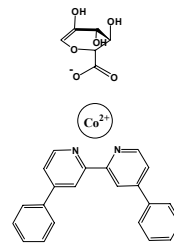

m/z 566  
-(Aux + Agl)

**Supplemental Figure 1.** Proposed structures of fragment ions of the Co(II) (naringenin-H) (4,7-dpphen)<sub>2</sub>]<sup>+</sup>.
